# Supplementary material for: CLUSTERING GENE EXPRESSION PROFILES USING MIXTURE MODEL ENSEMBLE AVERAGING APPROACH
Source: Royal Society of Chemistry journal article supplement (doi:10.1039/d1sm01197a), 2008-01-01
Supplement: d1sm01197a1.pdf [file d1sm01197a1.pdf]

**Electronic supplementary information (ESI)†**

**Temperature- and pH-responsive poly(N-isopropylacrylamide-co-methacrylic acid) microgels as a carrier for controlled protein adsorption and release**

Priyanshi Agnihotri,<sup>a</sup> Sangeeta,<sup>a</sup> Shikha Aery<sup>a</sup> and Abhijit Dan<sup>a\*</sup>

<sup>a</sup> Department of Chemistry and Centre for Advanced Studies in Chemistry, Panjab University  
– Chandigarh, Sector 14, Chandigarh 160014, India

Corresponding author

\*Email: [abhijit@pu.ac.in](mailto:abhijit@pu.ac.in) (A. Dan)

**Table S1 Reaction compositions for the synthesis of microgels**

| Code | NIPAM: BIS:<br>MAA (mol%) | NIPAM (gm) | BIS (gm) | MAA (gm) |
|------|---------------------------|------------|----------|----------|
| M1   | 87.5: 2.5: 10             | 1.504      | 0.058    | 0.130    |
| M2   | 85: 5: 10                 | 1.461      | 0.117    | 0.130    |
| M3   | 80: 10: 10                | 1.374      | 0.234    | 0.130    |

**Table S2 Hydrodynamic radius, polydispersity and VPTT\* of the microgels**

| Code | pH | $R_h^{20^\circ c}$<br>(nm) | $PDI^{20^\circ c}$ | $R_h^{60^\circ c}$<br>(nm) | $PDI^{60^\circ c}$ | VPTT<br>(°C) |
|------|----|----------------------------|--------------------|----------------------------|--------------------|--------------|
| M1   | 4  | 468.9                      | 0.061              | 198.6                      | 0.102              | 37.3         |
|      | 9  | 603.3                      | 0.11               | 280                        | 0.156              | 37.1         |
| M2   | 4  | 429.5                      | 0.040              | 187.43                     | 0.135              | 36.9         |
|      | 9  | 518.7                      | 0.077              | 276.4                      | 0.181              | 37.4         |
| M3   | 4  | 391.2                      | 0.023              | 185.23                     | 0.119              | 37.2         |
|      | 9  | 459.1                      | 0.087              | 267                        | 0.166              | 36.8         |

\* The VPTT was determined from the second derivative plot of the hydrodynamic radius with respect to temperature ( $d^2R_h/dT^2$ ) vs temperature (T). The temperature at which  $d^2R_h/dT^2 = 0$  corresponded the VPTT of microgels.

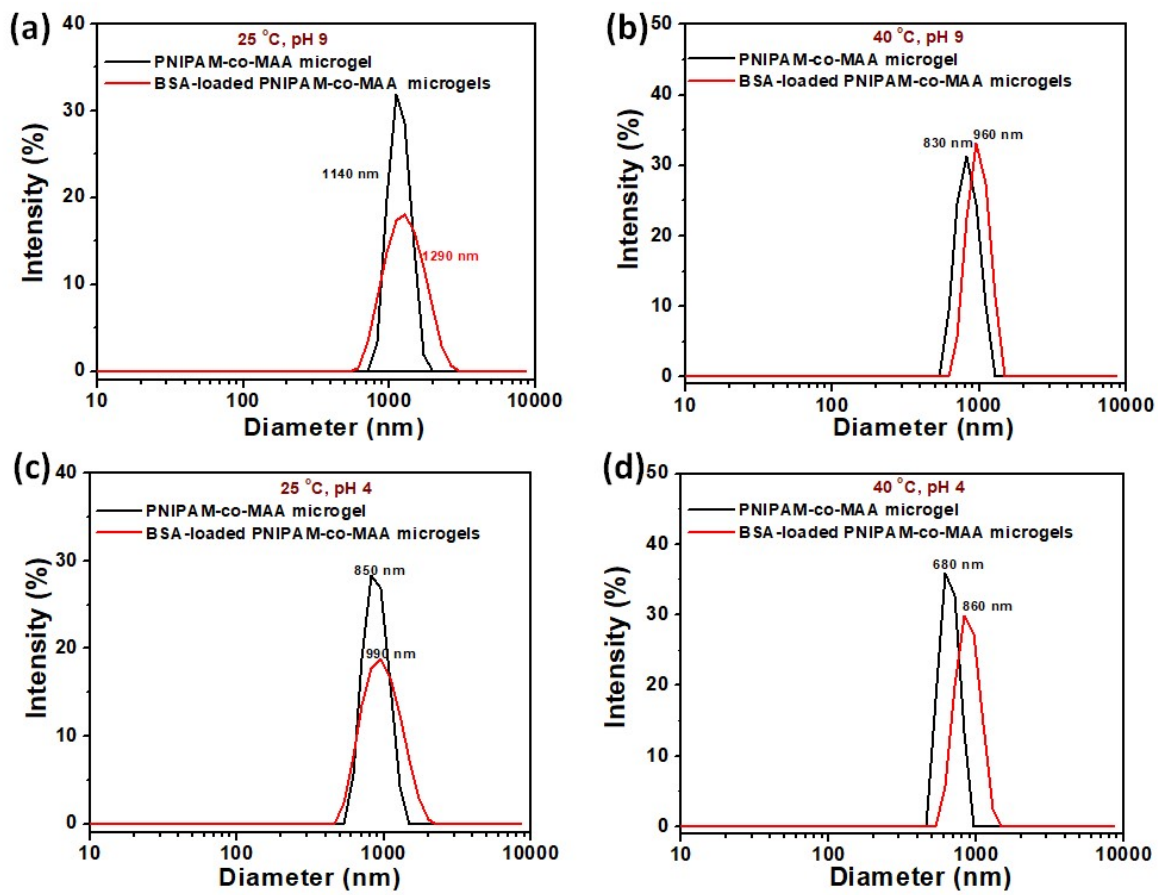

**Fig. S1** Intensity size distribution comparison of BSA-loaded PNIPAM-co-MAA microgels (2.5% BIS) with pure PNIPAM-co-MAA microgels at 40 °C.

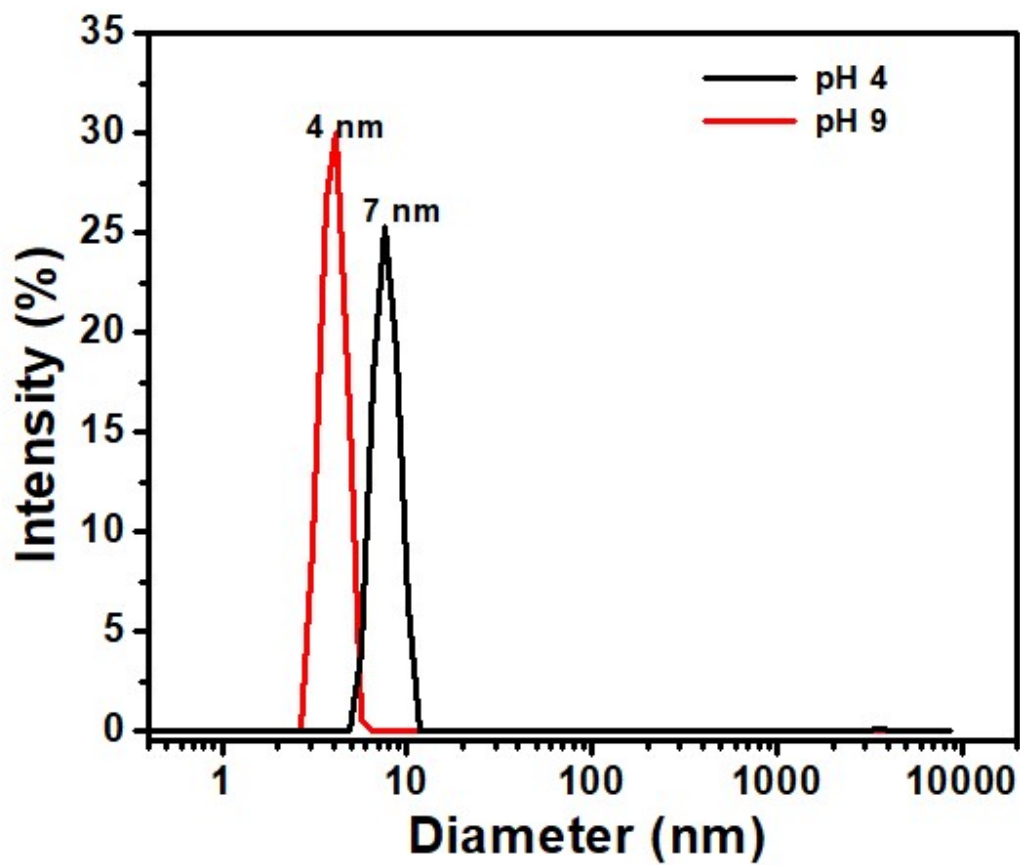

**Fig. S2** Intensity Size distribution obtained for BSA molecule from DLS measurement at pH 4 and pH 9 (25 °C).

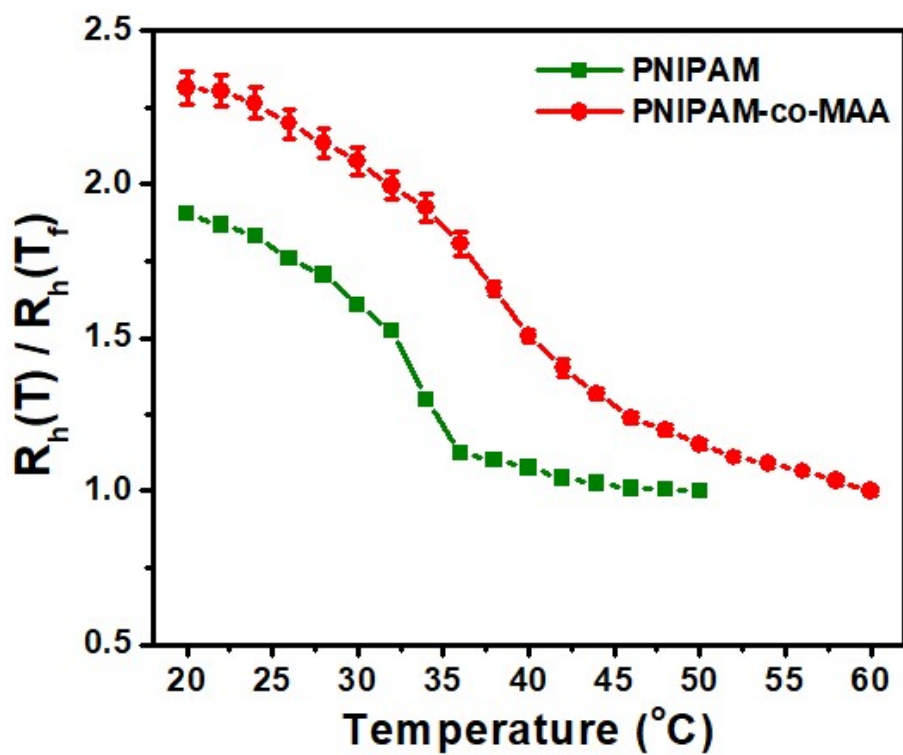

**Fig. S3** Normalized hydrodynamic radius as a function of temperature of PNIPAM and PNIPAM-co-MAA microgels (5 mol% BIS) measured at pH 7.
